# Supplementary material
Source: publisher site journal article supplement (https://www.dovepress.com/article/361839)
Supplement: Supplementary file 1 [file get_supplementary_file.php]

**Table 1S. Comparison of lung function parameters (LFPs) by age group for Indigenous and non-Indigenous patients with COPD.**

| **LFPs** | **Expression mode** | **18<35** | **35<50** | **50<65** | **65<75** | **75<85** | **>85** |
| --- | --- | --- | --- | --- | --- | --- | --- |
| **Indigenous** | | | | | | | |
|  |  | **(n=13)** | **(n=68)** | **(n=116)** | **(n=35)** | **(n=6)** | **(n=2)** |
| FVC | LLN (L) | 3.89 (3.44, 4.34) | 3.19 (3.05, 3.33)* | 2.87 (2.76, 2.98)* | 2.55 (2.36, 2.74)* | 1.97 (1.5, 2.44) | 1.51 (-1.99, 5) |
| Pre-BD (L) | 2.88 (2.08, 3.67)* | 1.99 (1.81, 2.17)* | 2.03 (1.91, 2.16)* | 2.05 (1.77, 2.34)* | 1.66 (1.15, 2.16)* | 1.55 (-7.03, 10.12) |
| Pre-BD (%) | 60.46 (45.92, 75.01)* | 50.29 (46.72, 53.87)* | 55.78 (52.6, 58.95)* | 60.66 (53.97, 67.34)* | 62 (49.16, 74.84) | 67 (-187.12, 321.12) |
| Post-BD (L) | 3.05 (2.26, 3.85)* | 2.17 (1.99, 2.36)* | 2.15 (2.02, 2.28)* | 2.19 (1.91, 2.46)* | 1.74 (1.24, 2.24)* | 1.47 (-6.03, 8.97) |
| Post-BD (%) | 64.15 (50.12, 78.19)* | 54.44 (50.81, 58.08)* | 59.16 (55.94, 62.37)* | 62.77 (55.58, 69.97)* | 64.83 (52.68, 76.99) | 64.5 (-145.15, 274.15) |
| FEV1 | LLN (L) | 3.21 (2.86, 3.56) | 2.53 (2.42, 2.64)* | 2.18 (2.09, 2.26)* | 1.86 (1.73, 2)* | 1.38 (1.05, 1.7) | 1.07 (-2.05, 4.18) |
| Pre-BD (L) | 1.79 (1.16, 2.43)* | 1.15 (1.02, 1.28)* | 1.15 (1.06, 1.24)* | 1.2 (1.01, 1.38)* | 0.93 (0.65, 1.2)* | 1.04 (-4.24, 6.31) |
| Pre-BD (%) | 44.31 (30.93, 57.69)* | 35.59 (32.16, 39.02)* | 41.5 (37.89, 45.11)* | 47.11 (41.07, 53.16) | 48 (33.75, 62.25) | 60.5 (-123.74, 244.74) |
| Post-BD (L) | 1.88 (1.3, 2.47)* | 1.27 (1.14, 1.41)* | 1.22 (1.13, 1.32)* | 1.29 (1.09, 1.48)* | 0.96 (0.69, 1.23)* | 1.02 (-4.06, 6.1) |
| Post-BD (%) | 47.23 (34.71, 59.75)* | 39.26 (35.69, 42.84)* | 42.97 (39.88, 46.07)* | 50.43 (44.35, 56.5) | 49.83 (35.03, 64.64) | 60 (-117.89, 237.89) |
| FEV1/FVC | LLN (absolute) | 0.74 (0.72, 0.76) | 0.7 (0.68, 0.72) | 0.68 (0.67, 0.69) | 0.65 (0.65, 0.66)* | 0.64 (0.62, 0.65) | 0.63 (0.63, 0.63)* |
| < LLN (n (%)) | 13 (100%) | 66 (97%)* | 107 (92%)* | 29 (83%) | 5 (83%) | 0 (0%) |
| Pre-BD (absolute) | 0.6 (0.53, 0.67) | 0.57 (0.54, 0.59)* | 0.55 (0.53, 0.57)* | 0.59 (0.56, 0.63) | 0.57 (0.44, 0.69) | 0.68 (0.3, 1.06) |
| Post-BD (absolute) | 0.6 (0.55, 0.66) | 0.57 (0.55, 0.6)* | 0.55 (0.53, 0.57)* | 0.57 (0.54, 0.6) | 0.57 (0.43, 0.7) | 0.7 (0.63, 0.76) |
| **Non-Indigenous** | | | | | | | |
|  |  | **(n=27)** | **(n=67)** | **(n=329)** | **(n=292)** | **(n=141)** | **(n=17)** |
| FVC | LLN (L) | 4.33 (4.03, 4.63) | 3.94 (3.78, 4.1)* | 3.3 (3.24, 3.37)* | 2.95 (2.88, 3.02)* | 2.4 (2.3, 2.5) | 1.76 (1.49, 2.03) |
| Pre-BD (L) | 4.26 (3.64, 4.87)* | 3.78 (3.49, 4.06)* | 2.95 (2.84, 3.06)* | 2.5 (2.41, 2.59)* | 2.27 (2.16, 2.39)* | 1.96 (1.62, 2.3) |
| Pre-BD (%) | 81.23 (72.2, 90.26)* | 79.19 (74.79, 83.58)* | 71.34 (69.28, 73.41)* | 66.83 (64.9, 68.77)* | 72.24 (69.36, 75.11) | 80.58 (66.21, 94.96) |
| Post-BD (L) | 4.3 (3.65, 4.94)* | 3.94 (3.65, 4.22)* | 3.15 (3.03, 3.26)* | 2.68 (2.59, 2.77)* | 2.43 (2.31, 2.54)* | 2.01 (1.66, 2.37) |
| Post-BD (%) | 81.88 (72.39, 91.37)* | 82.48 (78.17, 86.79)* | 76.1 (74.07, 78.13)* | 71.72 (69.79, 73.65)* | 77.27 (74.32, 80.22) | 83.44 (67.72, 99.15) |
| FEV1 | LLN (L) | 3.55 (3.32, 3.77) | 3.02 (2.89, 3.14)* | 2.45 (2.4, 2.5)* | 2.09 (2.04, 2.14)* | 1.62 (1.55, 1.69) | 1.12 (0.97, 1.28) |
| Pre-BD (L) | 2.63 (2.22, 3.04)* | 2.42 (2.21, 2.62)* | 1.77 (1.69, 1.85)* | 1.45 (1.38, 1.52)* | 1.35 (1.27, 1.43)* | 1.13 (0.89, 1.36) |
| Pre-BD (%) | 60.91 (52.76, 69.05)* | 63.94 (59.5, 68.38)* | 55.88 (53.67, 58.08)* | 52.46 (50.3, 54.63) | 59.92 (56.71, 63.14) | 66.59 (51.18, 82) |
| Post-BD (L) | 2.69 (2.25, 3.13)* | 2.49 (2.29, 2.7)* | 1.89 (1.81, 1.98)* | 1.56 (1.49, 1.62)* | 1.45 (1.36, 1.53)* | 1.2 (0.96, 1.45) |
| Post-BD (%) | 62.14 (53.67, 70.6)* | 65.93 (61.75, 70.12)* | 59.95 (57.81, 62.09)* | 56.25 (54.1, 58.41) | 64.41 (61.15, 67.68) | 70.94 (54.98, 86.91) |
| FEV1/FVC | LLN (absolute) | 0.74 (0.73, 0.74) | 0.7 (0.69, 0.7) | 0.67 (0.67, 0.67) | 0.65 (0.64, 0.65)* | 0.63 (0.63, 0.63) | 0.61 (0.6, 0.61)* |
| < LLN (n (%)) | 27 (100%) | 57 (85%)* | 252 (77%)* | 200 (69%) | 78 (55%) | 8 (47%) |
| Pre-BD (absolute) | 0.62 (0.58, 0.66) | 0.63 (0.61, 0.66)* | 0.59 (0.58, 0.6)* | 0.57 (0.56, 0.59) | 0.59 (0.57, 0.61) | 0.57 (0.52, 0.62) |
| Post-BD (absolute) | 0.62 (0.6, 0.64) | 0.63 (0.61, 0.65)* | 0.59 (0.58, 0.6)* | 0.57 (0.56, 0.59) | 0.59 (0.58, 0.61) | 0.59 (0.55, 0.63) |
| Data were presented as mean (95% CI).  * p<0.05 on two tailed students t-test between Indigenous and non-Indigenous patients.  **Abbreviations**: **BD**, Bronchodilator; **COPD**, Chronic obstructive pulmonary disease; **FEV1**, Forced expiratory volume in one second; **FVC**, Forced vital capacity; **LLN**, Lower limit of normal. | | | | | | | |

**Table 2S. Clinical characteristics of patients with FEV1/FVC < LLN & FEV1/FVC < 0.7 for both matched and unmatched Indigenous and non-Indigenous patients**

| **Unmatched** | **Unit/category** | **Indigenous (n=220)** | **non-Indigenous (n=622)** | **p-value** |
| --- | --- | --- | --- | --- |
| Age | (years) (mean, 95% CI) | 53.77 (52.23, 55.32) | 62.25 (61.24, 63.26) | <0.001* |
| Sex | (male) (n, %) | 117 (53) | 412 (66) | 0.001* |
| Height | (m) (mean, 95% CI) | 1.66 (1.65, 1.67) | 1.69 (1.69, 1.7) | <0.001* |
| BMI | (kg/m2) (median (IQR)) | 22.68 (18.91, 27.85) | 25.65 (21.72, 30.78) | <0.001* |
| Corpulence status  (n, %) | Underweight: BMI < 18.5 kg/m2 | 48 (22%) | 60 (10%) | <0.001* |
| Normal weight: BMI: 18.5-24.9 kg/m2 | 90 (41%) | 224 (36%) | 0.186 |
| Overweight: BMI: 25.0-29.9 kg/m2 | 45 (21%) | 167 (27%) | 0.063 |
| Obesity: BMI > 30.0 kg/m2 | 36 (16%) | 170 (27%) | 0.001* |
| Smoking status  (n, %) | Reported smoking status | 220 (100) | 135 (22%) | <0.001* |
| Never smoker | 15 (7%) | 32 (24%) | <0.001* |
| Former smoker | 90 (41%) | 63 (47%) | 0.287 |
| Current smoker | 115 (52%) | 40 (30%) | <0.001* |
| Smoking | (pack years) (median, (IQR)) | 21 (7, 40) | 45 (27, 68.75) | <0.001* |
| **Matched** | **Unit/category** | **Indigenous (n=75)** | **non-Indigenous (n=75)** | **p-value** |
| Age | (years) (mean, 95% CI) | 56.68 (53.7, 59.67) | 57.26 (54.38, 60.14) | 0.781 |
| Sex | (male) (n, %) | 46 (61) | 46 (61) | 0.999 |
| Height | (m) (mean, 95% CI) | 1.68 (1.66, 1.7) | 1.66 (1.64, 1.69) | 0.363 |
| BMI | (kg/m2) (median (IQR)) | 22.49 (19.04, 28.73) | 26.61 (22.06, 29.94) | 0.007* |
| Corpulence status  (n, %) | Underweight: BMI < 18.5 kg/m2 | 18 (24%) | 7 (9%) | 0.014* |
| Normal weight: BMI: 18.5-24.9 kg/m2 | 28 (38%) | 21 (28%) | 0.201 |
| Overweight: BMI: 25.0-29.9 kg/m2 | 14 (19%) | 29 (39%) | 0.008* |
| Obesity: BMI > 30.0 kg/m2 | 14 (19%) | 18 (24%) | 0.450 |
| Smoking status  (n, %) | Reported smoking status | 75 (100) | 75 (100) | 0.999 |
| Never smoker | 11 (15%) | 11 (15%) | 0.999 |
| Former smoker | 35 (47%) | 35 (47%) | 0.999 |
| Current smoker | 29 (39%) | 29 (39%) | 0.999 |
| Smoking | (pack years) (median, (IQR)) | 25.2 (7.5, 43.75) | 41.25 (27, 60) | 0.235 |
| p-value obtained via 2-tailed students t-test (continuous, normally distributed parameters), equality of medians test (non-parametric parameters) or 2-tailed proportions z-test (categorical parameters). * p<0.05  **Abbreviations:** **BMI**, Body mass index; **CI**, Confidence interval; **COPD**, Chronic obstructive pulmonary disease; **FEV1**, Forced expiratory volume in one second; **FVC**, Forced vital capacity; **IQR**, Interquartile range; **LLN**, Lower limit of normal. | | | | |
